# Supplementary material for: Aberrant epigenetic changes and gene expression in cloned cattle dying around birth
Source: PubMed Central journal article supplement (PMC2268668; doi:10.1186/1471-213x-8-14), 2008-02-11
Supplement: 1471-213X-8-14-S2.pdf [file 1471-213X-8-14-S2.pdf]

**Table S1. Primer and PCR parameter used for DNA methylation examination<sup>a</sup>**

|                 | Primer sequence (5'–3')                                                                    | Sequence accession | Location of primer              | Position of CpG island | Fragment size(bp) | No. of CpG sites in CpG island | Annealing temperature (°C) |
|-----------------|--------------------------------------------------------------------------------------------|--------------------|---------------------------------|------------------------|-------------------|--------------------------------|----------------------------|
| <i>β-actin</i>  | F: GTTTTTTTTTTTGGGTATGGAAT<br>F':TTTTTAATTTTATTATGAAGTGTGA<br>R: CCACATCTACTAAAAATAAACA    | AY141970           | 828-850<br>872-896<br>1085-1107 | Exon                   | 236               | 17                             | 50<br>50                   |
| <i>VEGF</i>     | F: TGAGGTAGTTGTGTGTATAGATAGT<br>R':AAAAAAACAAAAATTCATAATTC<br>R: AACCTAAAACCACTAACATAATAA  | NM_174216          | 368-392<br>540-564<br>599-623   | Exon                   | 197               | 23                             | 50<br>50.7                 |
| <i>art2[19]</i> | F: TTTATGTGAAGAGTTGATTTATTGGA<br>R: CCAAACCTCCCTATCCATCTC                                  | X05087             | 63-83<br>199-224                |                        | 162               | 5                              | 51.4                       |
| <i>oct4</i>     | F: GATTTGGATGAGTTTTTAAGGGTTTT<br>R: ACTCCAACCTTCTCCTTATCCAAC                               | AF022986           | 3054-3079<br>3323-3346          | Exon1                  | 293               | 24 or 20 <sup>b</sup>          | 51.6                       |
| <i>TERT</i>     | F: ATTAATAGAGAATTGGTTTGAGG<br>F': AGTTTGGAGTTAAGGAAATTAAGT<br>R: AATCCAAAAAAAACCTCATAACAAC | DQ399842           | 302-324<br>374-397<br>632-655   | Promoter               | 282               | 24                             | 50<br>50.7                 |
| <i>H19</i>      | F : TAATTATTTAGTAGTAGGTTATAG<br>R': CAATATCCCCAAATACACTAAAA<br>R: CCCCTAAATACTATTCTATCTCT  | AY849926           | 582-606<br>831-853<br>895-917   | Exon1                  | 272               | 24                             | 50<br>50.7                 |
| <i>Igf2</i>     | F: GTTTTGTTTATTTAGGATTTTGTTA<br>F':GATTAGAAGTGAGTTAAAGTGT<br>R: AATATTATTCTAATCCCCTCAAC    | NM_174087          | 586–610<br>643–664<br>837–859   | Exon10<br>(DMR)        | 217               | 12                             | 50<br>55.4                 |

<sup>a</sup> F, forward outer primer; F', forward inner primer; R, reverse outer primer; R', reverse inner primer.

<sup>b</sup> The amplified CpG island included 24 CpG sites or 20 CpG sites (an absent 13bp from 243 to 255 nt in some clones).

**Table S2. Primer and PCR parameter used for histone H4 acetylation examination <sup>a</sup>**

|                | Primer sequence (5'—3')       | Sequence accession | Position | Fragment size(bp) | Annealing temperature (°C) |
|----------------|-------------------------------|--------------------|----------|-------------------|----------------------------|
| <i>β-actin</i> | F: GCTCGCCATCAGTTACAAG        | AY293622           | 420      | 231               | 56                         |
|                | R: GGACACACAGACCCGAGAGT       |                    | 631      |                   |                            |
| <i>VEGF</i>    | F: GAGACCCTGGTGGACATCTTCC     | NM_174216          | 708      | 121               | 62                         |
|                | R: GCACACACTCCAGACTTTCGTC     |                    | 807      |                   |                            |
| <i>art2</i>    | F:CATCCAGCCATCTCATCCTC        | X05087             | 138      | 179               | 60                         |
|                | R:GAGATCCAACCGATCCATTC        |                    | 316      |                   |                            |
| <i>Oct4</i>    | F:GAGGAAGAGACAAGTGCAAGCAAT    | AF022986           | 1495     | 103               | 60                         |
|                | R:AGCGTCTAGAGCTACTTGGTGAGC    |                    | 1597     |                   |                            |
| <i>TERT</i>    | F:GTTTCCTTCCAACGTGAGCCTCG     | DQ399842           | 3957     | 102               | 60                         |
|                | R:AGCAGTGAGAGCAACGTCTACCTT    |                    | 4058     |                   |                            |
| <i>H19</i>     | F:GGATATCGACGTTTCCTTTAGACTC   | AY849926           | 1455     | 248               | 60                         |
|                | R:AAATGCAGCATATTCTTGAGTCAG    |                    | 1702     |                   |                            |
| <i>Igf2</i>    | F: TGCTCCTCTTGTCACATAACACACA  | NW_930796          | 360      | 98                | 60                         |
|                | R: GCATGGTGACAAATAACATCATAACC |                    | 457      |                   |                            |

<sup>a</sup> F, forward outer primer; R, reverse outer primer.

**Table S3. Primer and PCR parameter used for real-time quantitative PCR <sup>a</sup>**

| Gene           | Primer sequence (5'–3')                        | Sequence accession | Position  | Fragment size(bp) | Annealing temperature (°C) |
|----------------|------------------------------------------------|--------------------|-----------|-------------------|----------------------------|
| <i>GAPDH</i>   | F: C G A C T T C A A C A G C G A C A C T C A C | NM_001034034       | 918-939   | 118               | 60                         |
|                | R: C C C T G T T G C T G T A G C C A A A T T C |                    | 1015-1036 |                   |                            |
| <i>β-actin</i> | F: T G G C G C T T G A C T C A G G A T T T     | NM_173979          | 1344-1363 | 105               | 60                         |
|                | R: G T A C A A T C A A G T C C T C G G C C A C |                    | 1427-1448 |                   |                            |
| <i>VEGF</i>    | F: G A G C G G A G A A A G C A T T T G T T T G | NM_174216          | 984-1005  | 104               | 60                         |
|                | R: C G T T C G T T T A A C T C A A G C T G C C |                    | 1066-1087 |                   |                            |
| <i>H19</i>     | F: A G A G A T G G T G C T A C C C A G C T C A | AY849926           | 1615-1636 | 101               | 60                         |
|                | R: T G T A G T G G T T C C A A A T G C A G C   |                    | 1694-1715 |                   |                            |
| <i>Igf2</i>    | F: G C A T C G T G G A A G A G T G T T G C T T | NM_174087          | 302-323   | 102               | 60                         |
|                | R: T C G T A G A G G C A G A C A C A T C C C T |                    | 382-403   |                   |                            |

<sup>a</sup> F, forward outer primer; R, reverse outer primer.
